# Supplementary material
Source: PubMed Central journal article supplement (PMC4262768)

Supplemental Figure 1

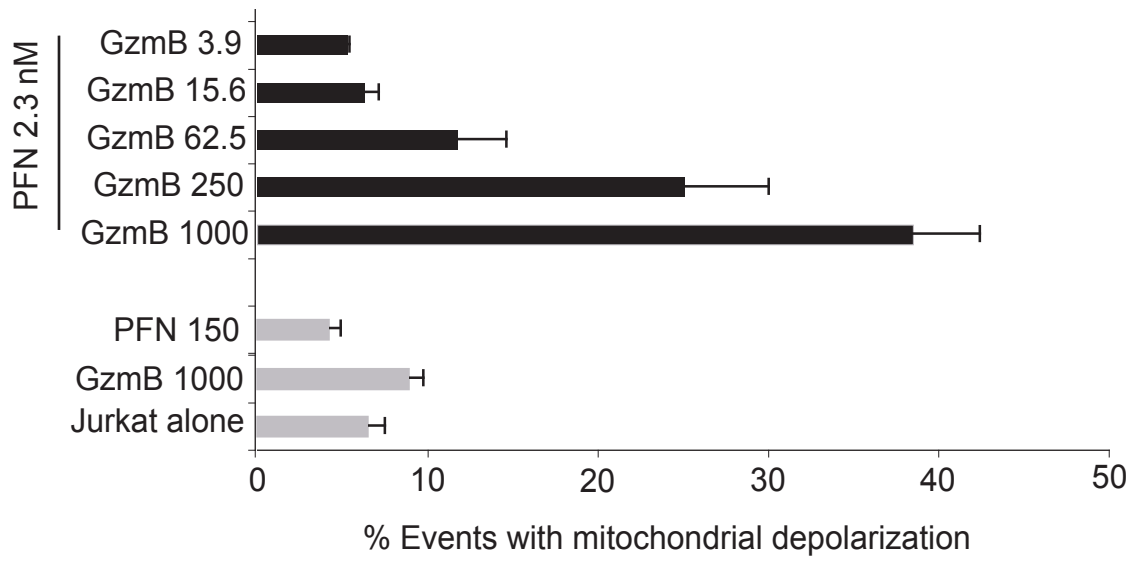

Supplement: cdd2014110x2.pdf [file cdd2014110x2.pdf]

Supplemental Figure 2

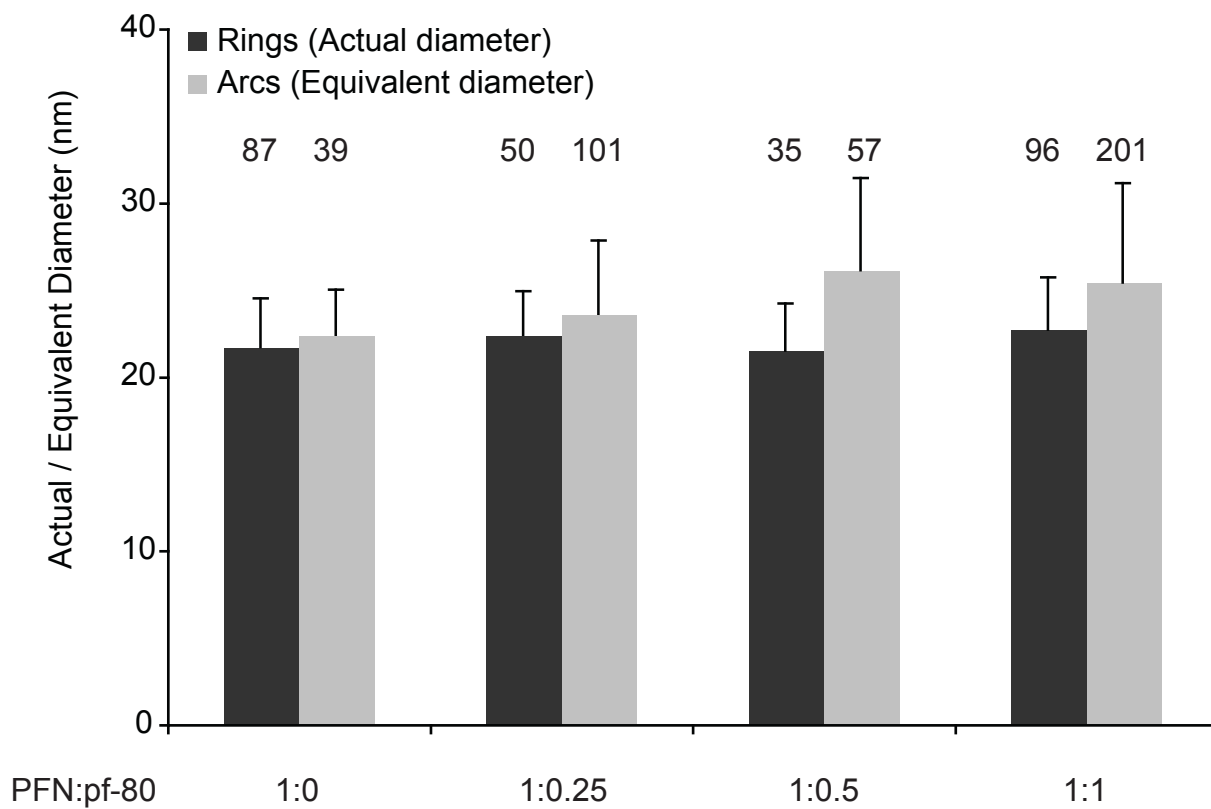

Supplement: cdd2014110x3.pdf [file cdd2014110x3.pdf]

Supplemental Figure 3

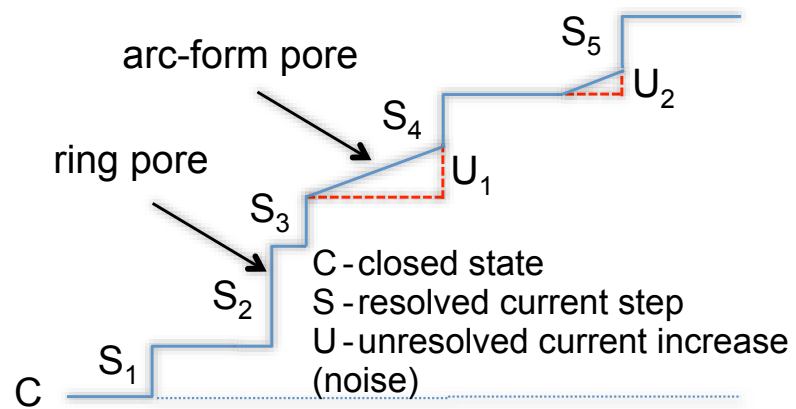

Supplement: cdd2014110x4.pdf [file cdd2014110x4.pdf]

Supplemental Fig 4a

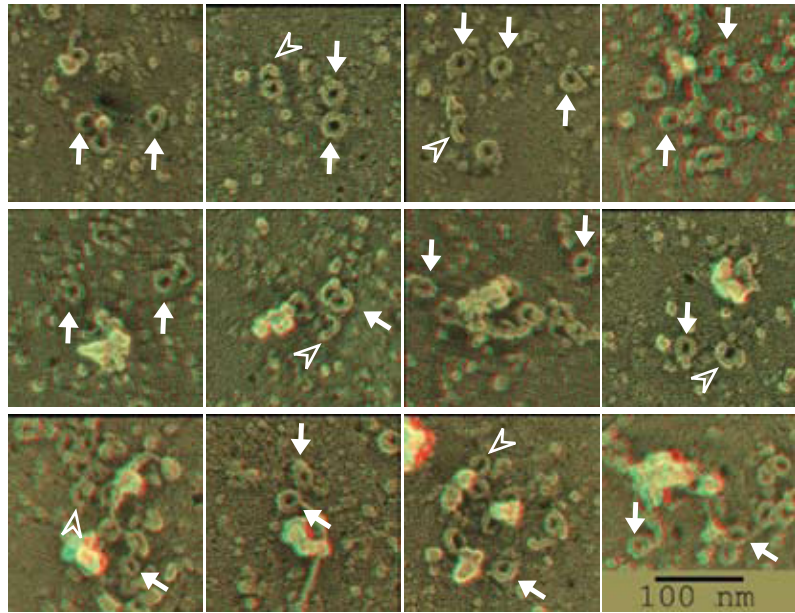

Supplement: cdd2014110x5.pdf [file cdd2014110x5.pdf]

Supplemental Figure 4b

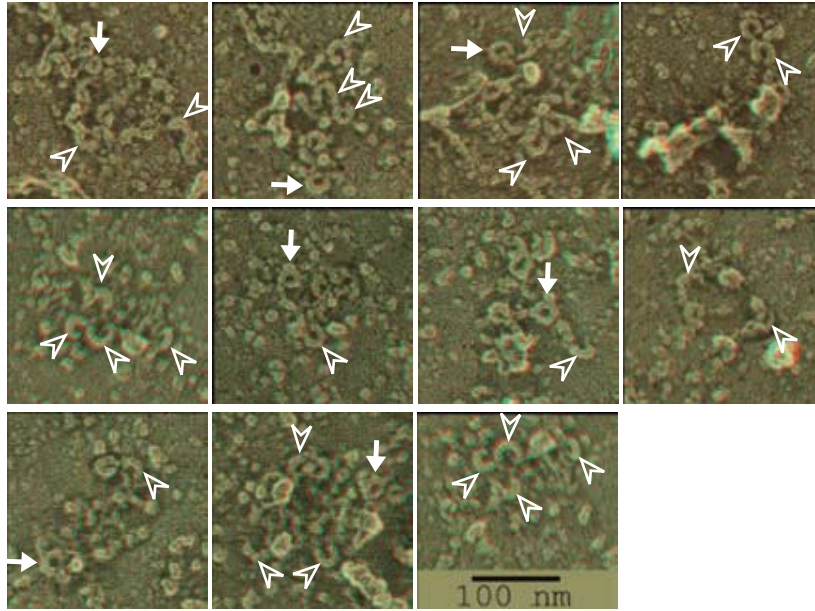

Supplement: cdd2014110x6.pdf [file cdd2014110x6.pdf]

Supplemental Figure 4c

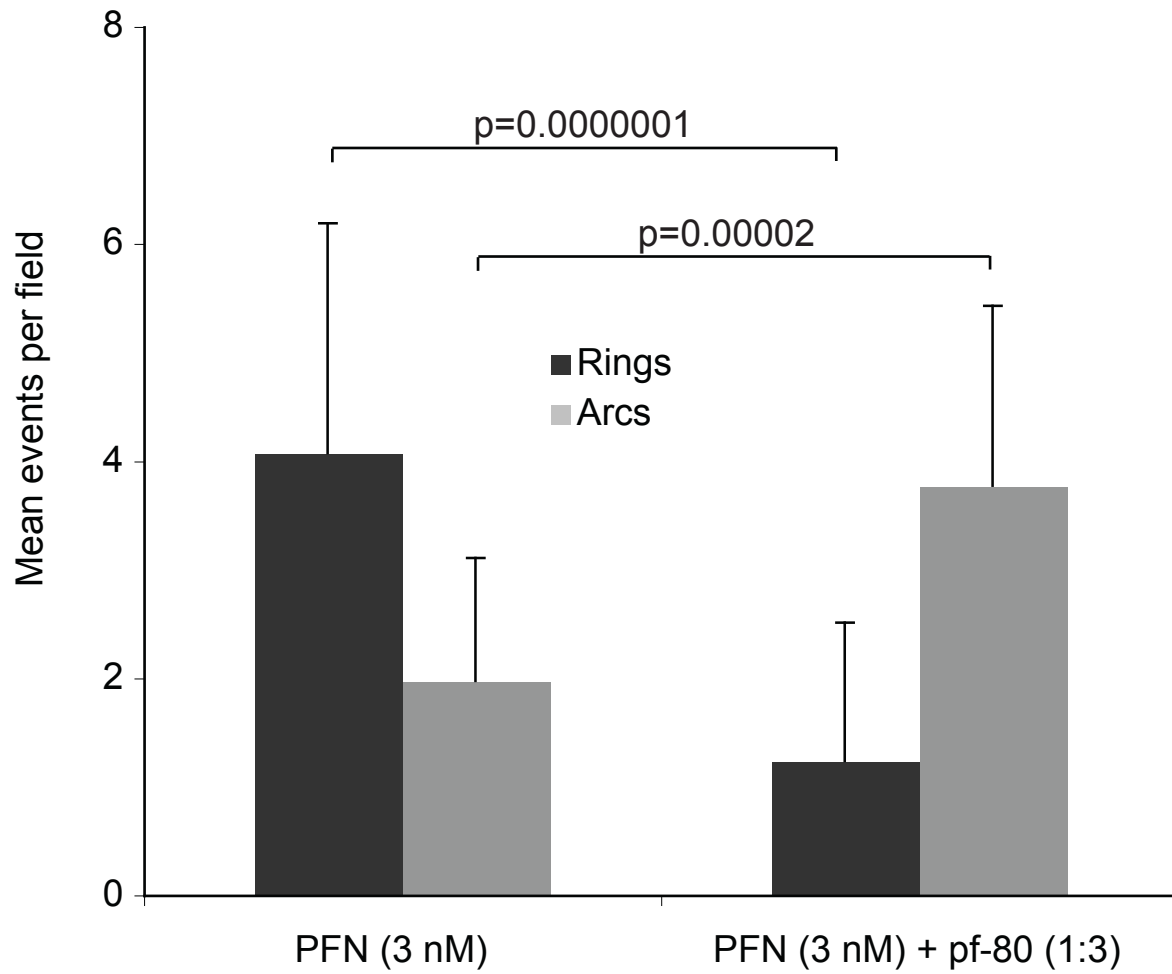

Supplement: cdd2014110x7.pdf [file cdd2014110x7.pdf]

Supplemental Fig. 5

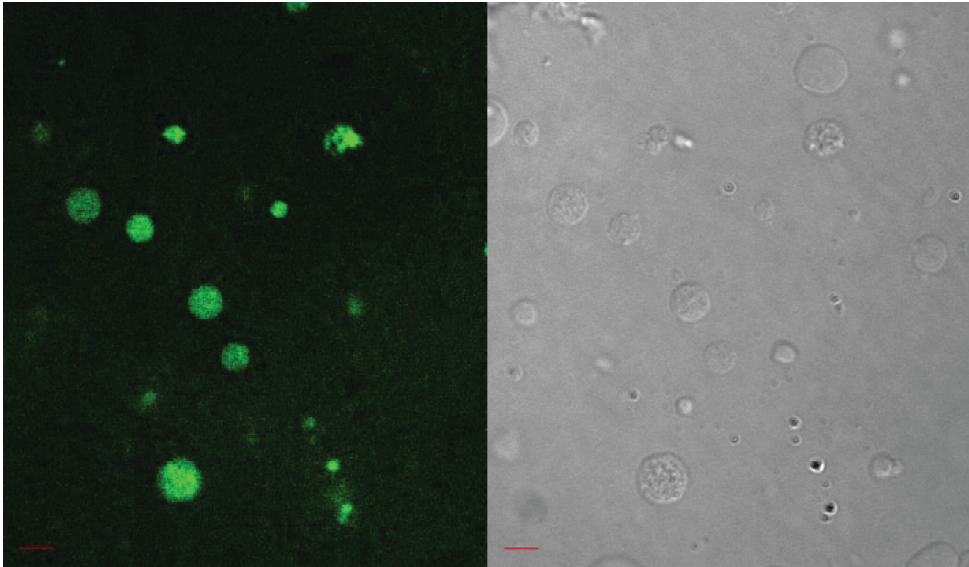

300 nM GzmB-alexa-488  
Rt, 50 min incubation

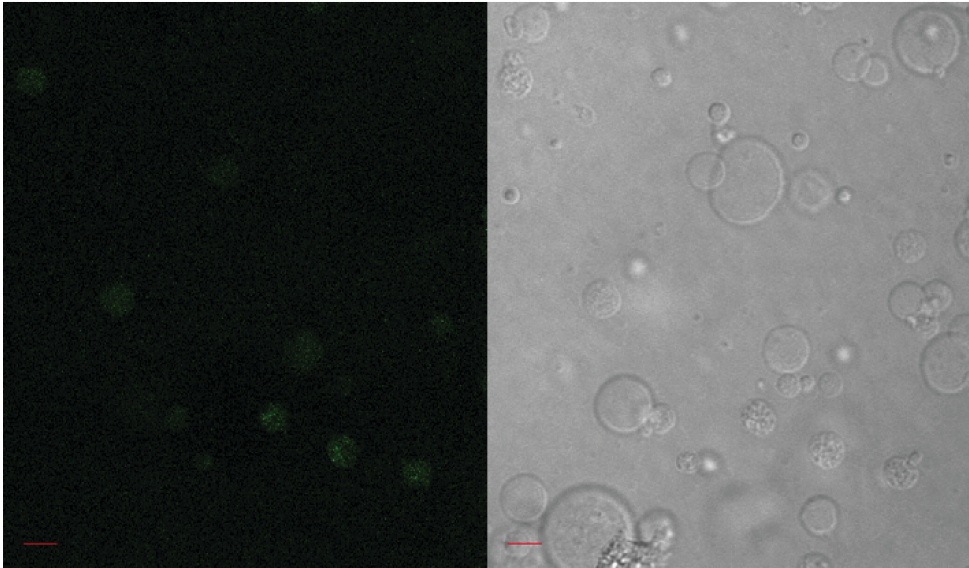

100 nM GzmB-Alexa-488  
Rt, 50 min incubation

Supplement: cdd2014110x8.pdf [file cdd2014110x8.pdf]
